# Supplementary material for: Demarcating geographic regions using community detection in commuting networks with significant self-loops
Source: PLoS One. 2020 Apr 29;15(4):e0230941. doi: 10.1371/journal.pone.0230941 (PMC7190107; doi:10.1371/journal.pone.0230941)
Supplement: S1 File — (ZIP) [file pone.0230941.s003.zip]

Archive with 18 entries (15 files):
- si/
- si/B1_rho_histogram.tiff
- __MACOSX/
- __MACOSX/si/
- __MACOSX/si/._B1_rho_histogram.tiff
- si/.DS_Store
- __MACOSX/si/._.DS_Store
- si/B4_diffinit.tiff
- __MACOSX/si/._B4_diffinit.tiff
- si/si.pdf
- __MACOSX/si/._si.pdf
- si/B3_compare_Sensitivity.tiff
- __MACOSX/si/._B3_compare_Sensitivity.tiff
- si/B2_mono_hist.tiff
- __MACOSX/si/._B2_mono_hist.tiff
- si/si.tex
- __MACOSX/si/._si.tex
- __MACOSX/._si
