# Supplementary material for: Demarcating geographic regions using community detection in commuting networks with significant self-loops
Source: PLoS One. 2020 Apr 29;15(4):e0230941. doi: 10.1371/journal.pone.0230941 (PMC7190107; doi:10.1371/journal.pone.0230941)
Supplement: S1 File — (ZIP) [file pone.0230941.s003.zip › si/si.tex]

\documentclass[]{article}


\usepackage[english]{babel}
\usepackage[utf8]{inputenc}
\usepackage{amsmath}
\usepackage{graphicx}
\usepackage[colorinlistoftodos]{todonotes}
%\usepackage[markers,nolists]{endfloat}
\bibliographystyle{plos2015}
%\bibliographystyle{ACM-Reference-Format-Journals}
\begin{document}

 
 \section{Supplementary Information } 
 \begin{figure}[htbp] \label{fig:rho_hist}
 	\centering
 %	 	\includegraphics[width=10cm]{B1_rho_histogram}
 	\caption{ Histogram of comparison of $\varrho_u$ with simulated data generated from Beta($\hat{a},\hat{b})$. In practice, $\hat{a}$ and $\hat{b}$ are respectively 3.86 and 4.50 for the commuting dataset in this study.} 
 \end{figure}
 
 \begin{figure}[htbp] \label{fig:nodal_hist}
 	\centering
 %	 	\includegraphics[width=7cm]{B2_mono_hist} 	
 	\caption{  Histogram of weight clustering coefficients as described in section 4.5.} 
 \end{figure}
 
 \begin{figure}[htbp] \label{fig:diff_tau_alpha}
%	 	\includegraphics[width=15cm, trim=3cm 9cm 2cm 3cm ,clip]{B3_compare_Sensitivity}
 	\caption{ CCME-SL algorithm run under varying constraints for $\tau$ (\textit{left}: $\tau=.8$,\textit{right}: $\tau=.5$) and $\alpha$. Decreasing the overlap parameter $\tau$ and  the significance  parameter $\alpha$ in general yields lower coverage of the total counties.}
 \end{figure}
 
 \begin{figure}[htbp] \label{fig:diff_init}
 %	\includegraphics[width=15cm, trim=1cm 9cm 1cm 3cm ,clip]{B4_diffinit}
 	\caption{ CCME-SL algorithm run under differing initializations using thresholding of self-loops  (\textit{left}: $W_{uu}>10,000$,\textit{right}: $W_{uu}>50,000$ and $\alpha$. The resultant communities do not differ much from those initialized with the threshold 20,000}
 \end{figure}
 
\end{document}
