# Supplementary material for: Demarcating geographic regions using community detection in commuting networks with significant self-loops
Source: PLOS journal article supplement (doi:10.1371/journal.pone.0230941), 2020-04-29
Supplement: S3 (10.1371/journal.pone.0230941.s003) [file journal.pone.0230941.s003]

## 1 Supplementary Figures

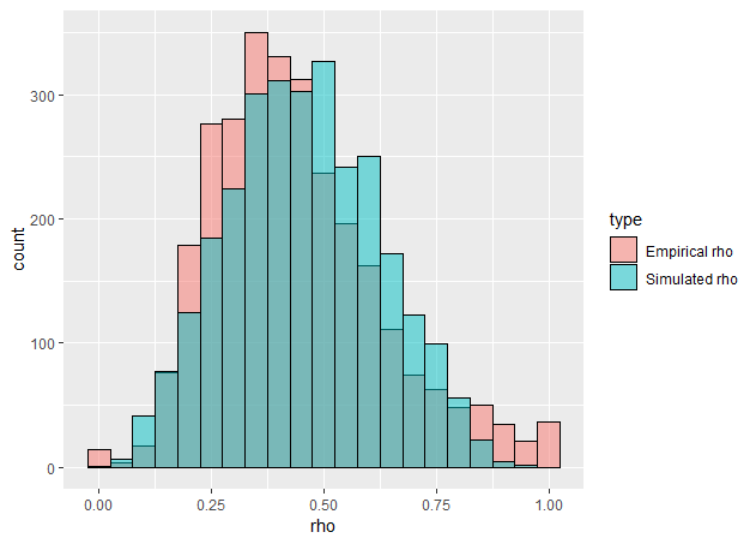

Figure 1: Histogram of comparison of  $\rho_u$  with simulated data generated from  $\text{Beta}(\hat{a}, \hat{b})$ . In practice,  $\hat{a}$  and  $\hat{b}$  are respectively 3.86 and 4.50 for the commuting dataset in this study.

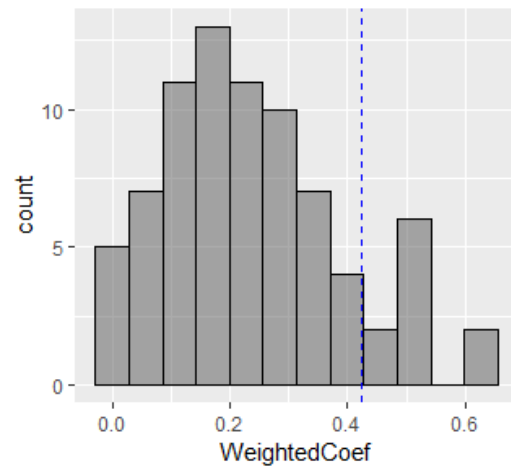

Figure 2: Histogram of weight clustering coefficients as described in section 4.5.

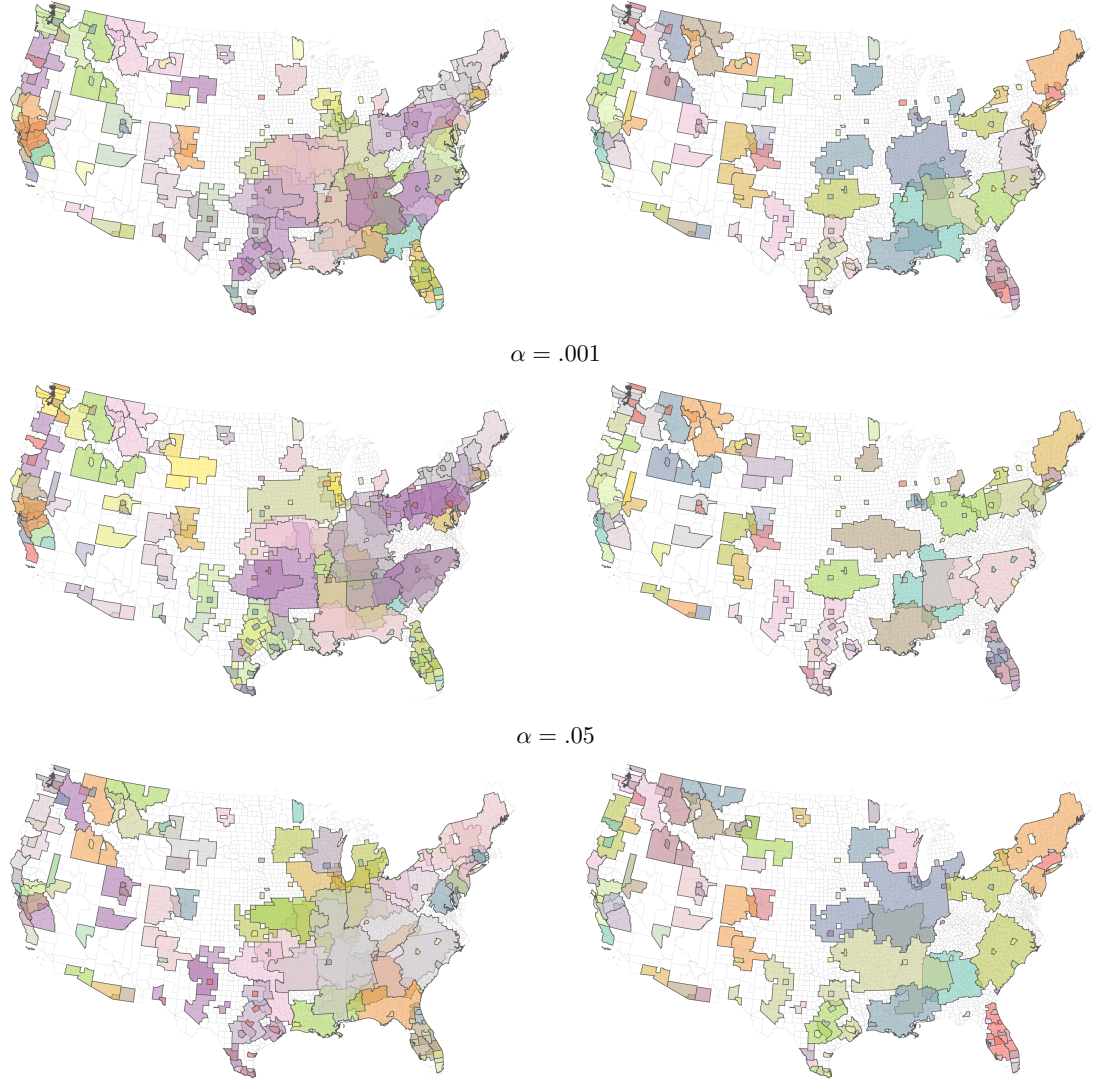

Figure 3: CCME-SL algorithm run under varying constraints for  $\tau$  (*left*:  $\tau = .8$ , *right*:  $\tau = .5$ ) and  $\alpha$ . Decreasing the overlap parameter  $\tau$  and the significance parameter  $\alpha$  in general yields lower coverage of the total counties.

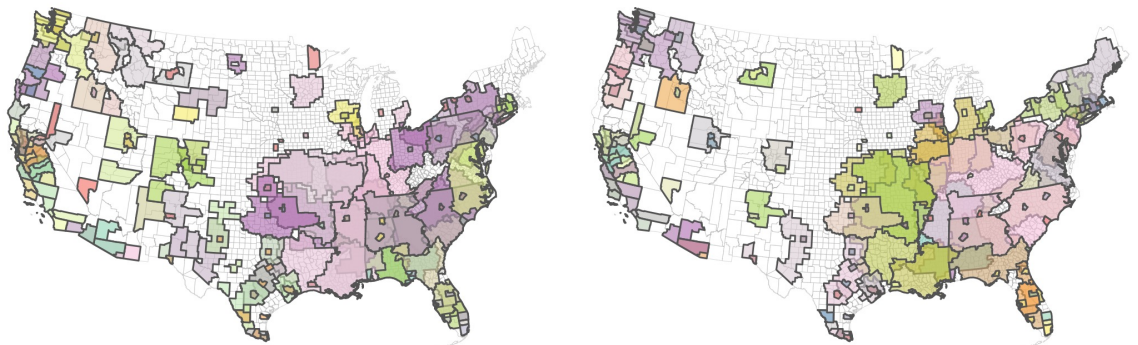

Figure 4: CCME-SL algorithm run under differing initializations using thresholding of self-loops (*left*:  $W_{uu} > 10,000$ , *right*:  $W_{uu} > 50,000$  and  $\alpha$ ). The resultant communities do not differ much from those initialized with the threshold 20,000
